# Supplementary material for: Highly stable nickel metal-modified black phosphorus-based photodetectors with enhanced magnetic field-assisted photoresponse
Source: Royal Society of Chemistry journal article supplement (doi:10.1039/d4tc04391j), 2024-11-19
Supplement: d4tc04391j1.pdf [file d4tc04391j1.pdf]

## Supplementary Information

### Highly stable nickel metal-modified black phosphorus-based photodetectors with enhanced magnetic field-assisted photoresponse

Zhiwen Leng<sup>1, a</sup>, Xi Zhang<sup>1, b</sup>, Hui Qiao<sup>\*, a</sup>, Xi Cheng<sup>a</sup>, Siwei Luo<sup>a</sup>, Zongyu Huang<sup>a</sup>,  
Zhongjun Li<sup>d</sup>, Qiaoliang Bao<sup>\*, c</sup>, Xiang Qi<sup>\*, a</sup>

<sup>a</sup> School of Physics and Optoelectronic Engineering, Xiangtan University, Xiangtan,  
Hunan, 411105, China

<sup>b</sup> Electron Microscopy Centre of Shenzhen University, Shenzhen University,  
Shenzhen, 518060, China

<sup>c</sup> Institute of Energy Materials Science (IEMS), University of Shanghai for Science  
and Technology, Shanghai 200093, China

<sup>d</sup> Faculty of Innovation Engineering, Macau University of Science and Technology,  
Macau 999078, China

<sup>1</sup> These authors contributed equally to this work.

**Figure S1**

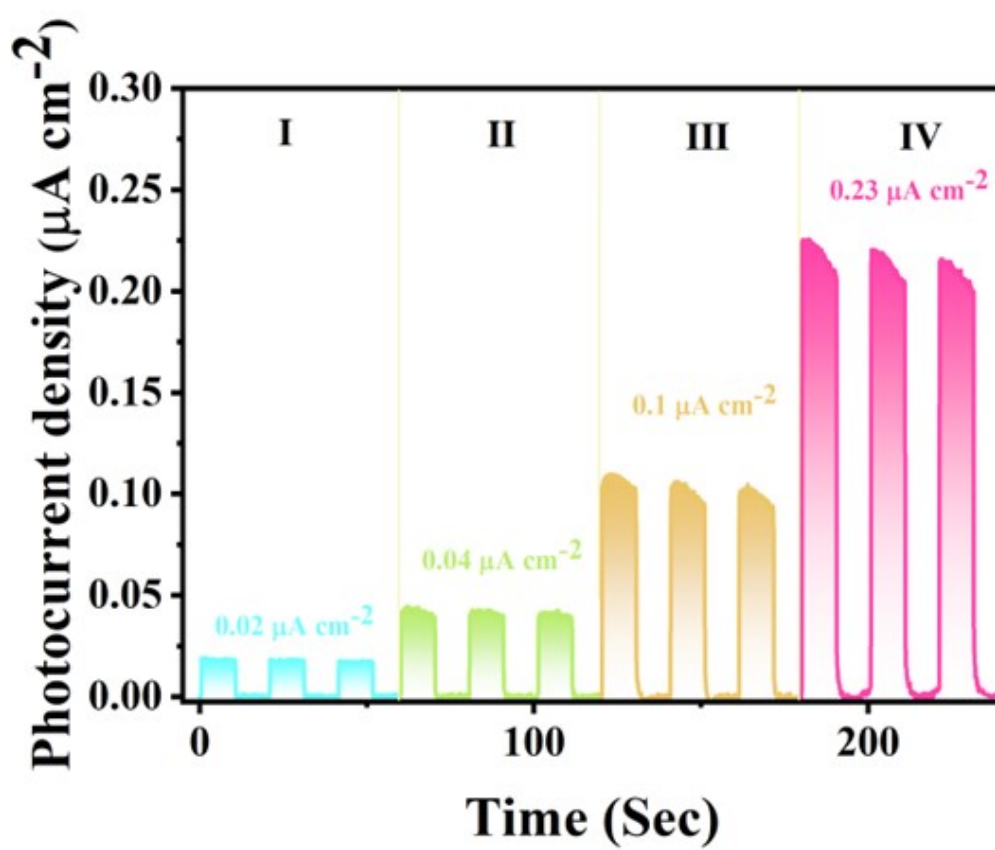

**Figure S1.** Figure of optical on/off behavior of sole BP nanosheets at 0-0.6 V.

**Figure S2**

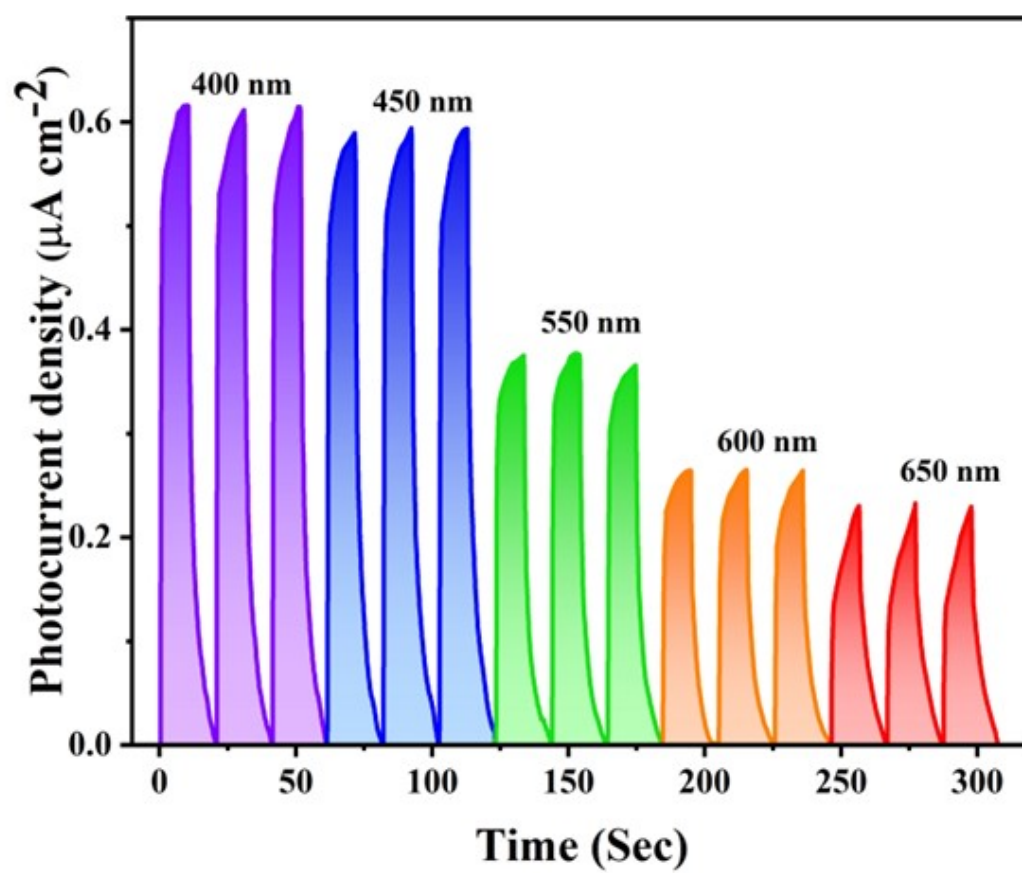

**Figure S2.** Light on/off behavior of Ni/BP at different wavelengths with a light intensity of  $50 \text{ mW/cm}^2$ .

**Figure S3**

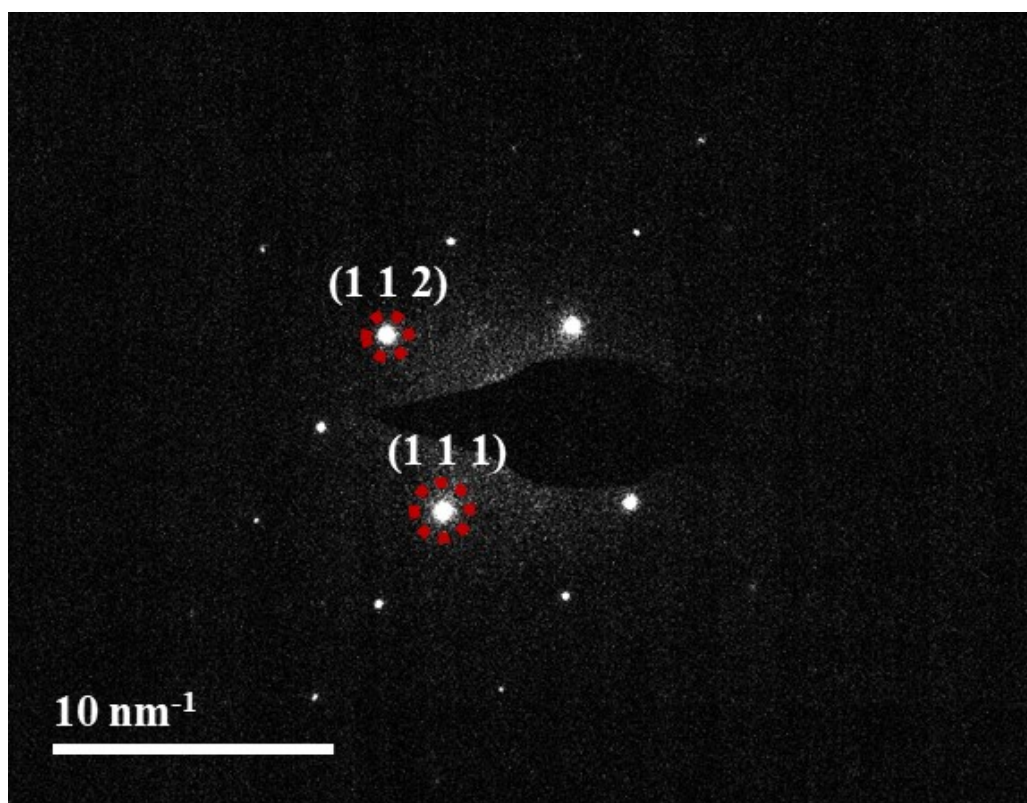

**Figure S3.** The SAED image of BP nanosheets.

Figure S4

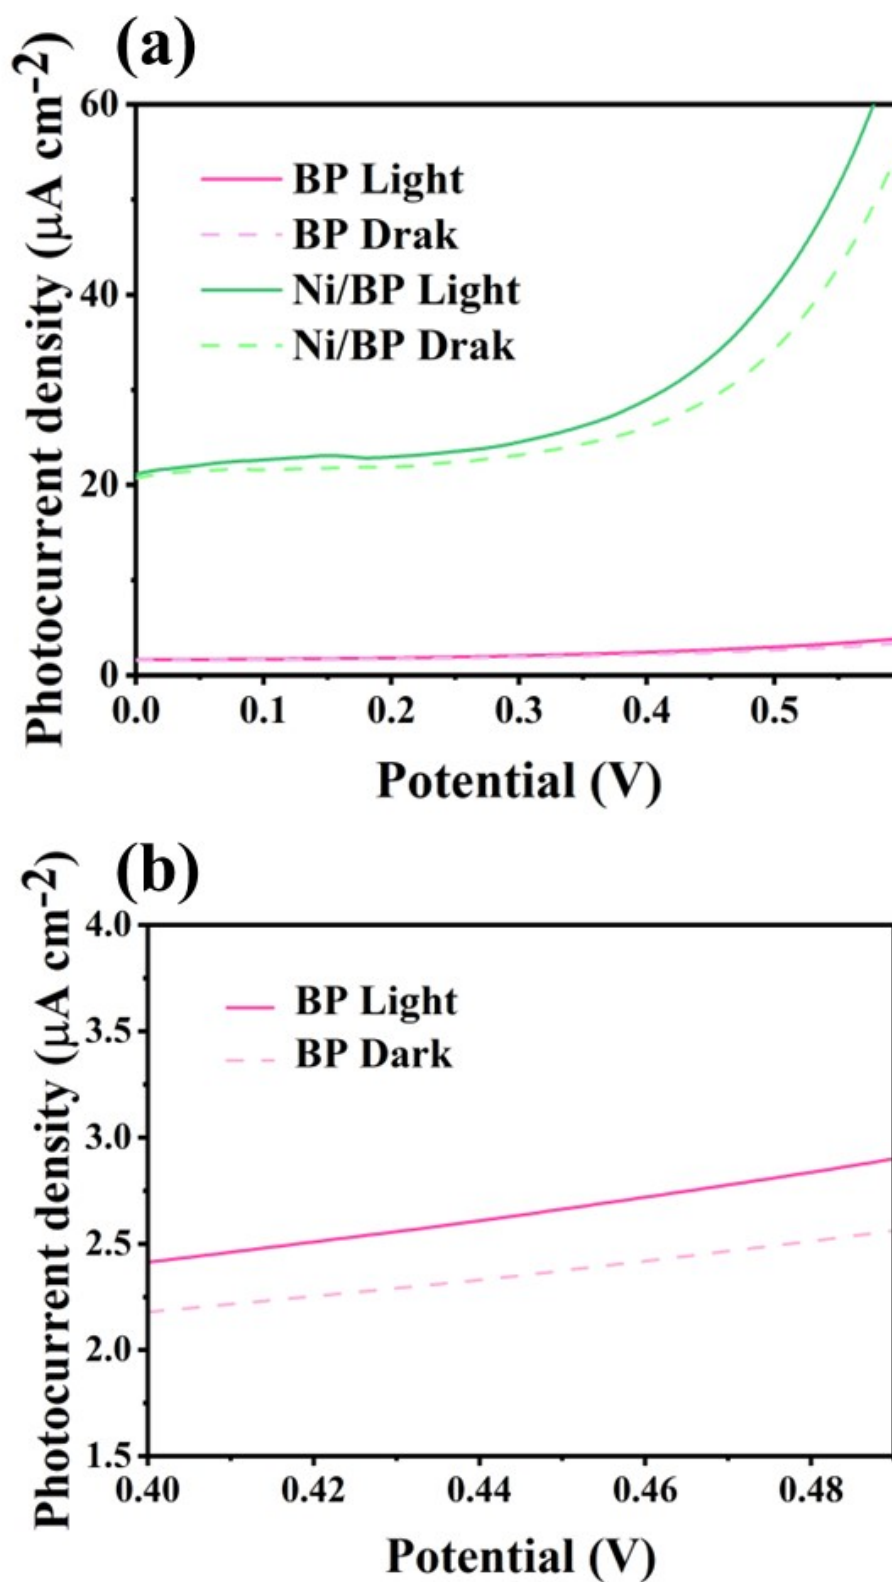

**Figure S5.** (a-b) Linear cyclic voltammograms (LSV) of bare BP nanosheets and Ni/BP in light and dark conditions.

**Figure S5**

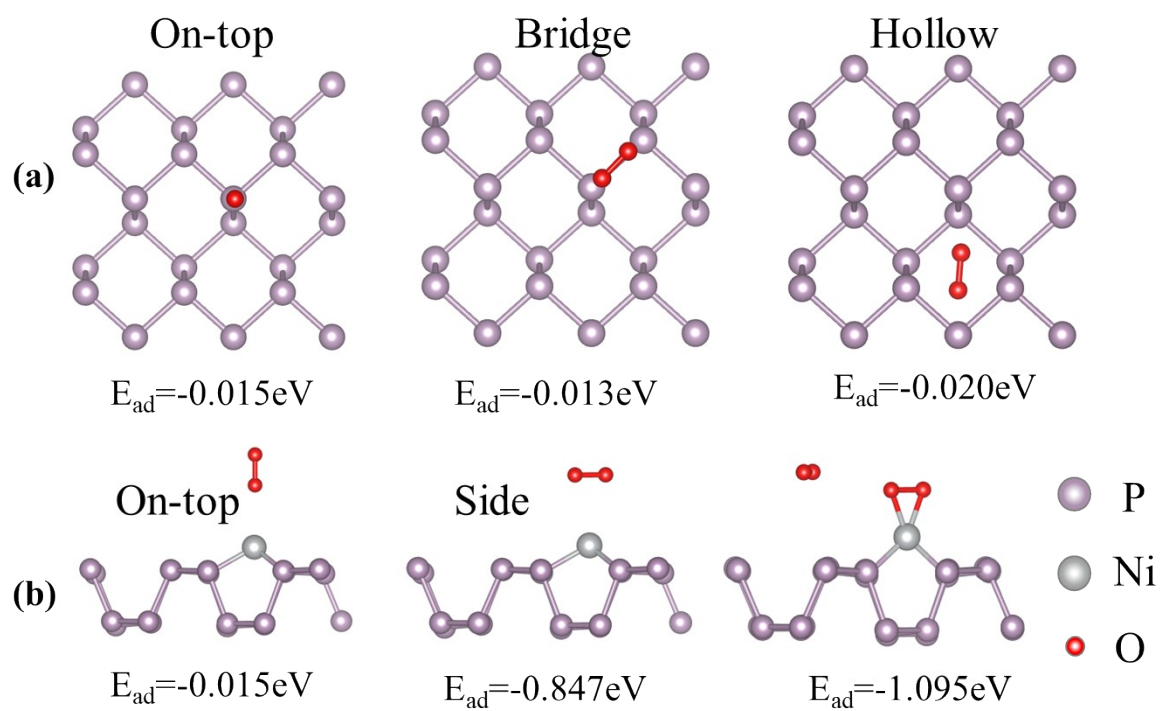

**Figure S6.** adsorption sites and adsorption energies on (a) BP and (b) Ni/BP.

**Figure S6**

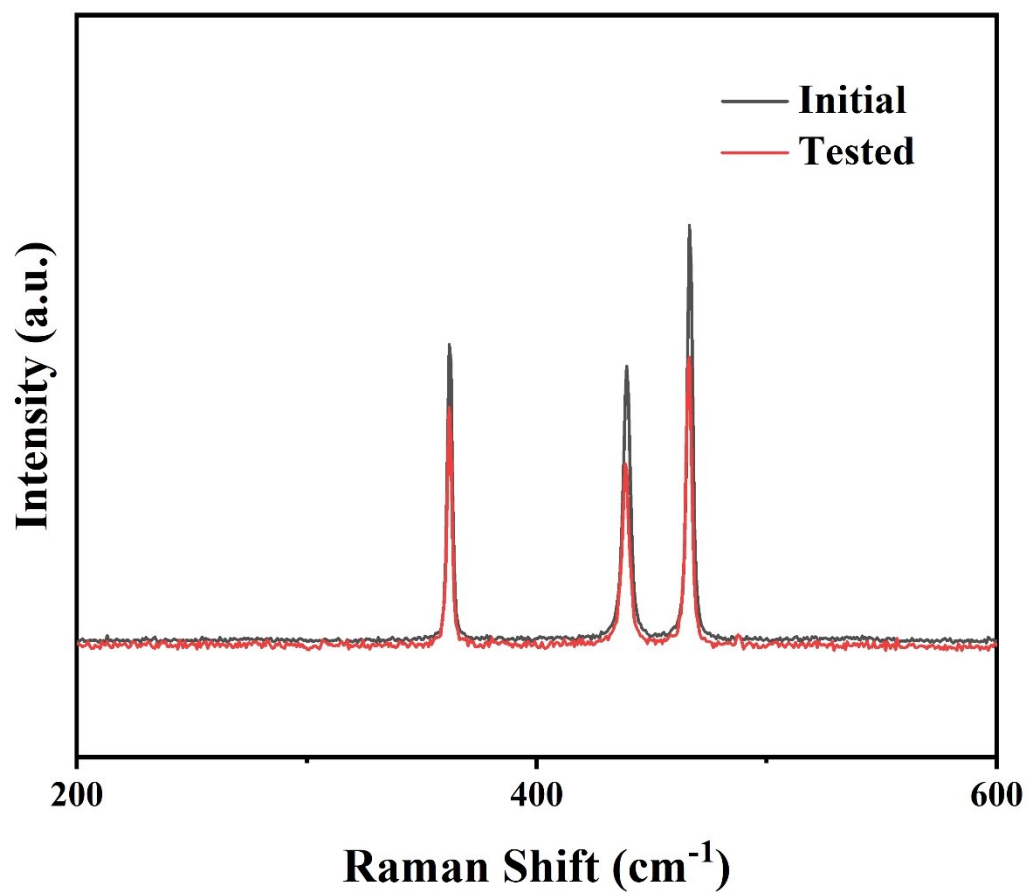

**Figure S7.** Raman profiles of initial Ni/BP and Ni/BP after photoresponse testing.
